# Supplementary material for: Clinical activity of pembrolizumab with or without chemotherapy in advanced pulmonary large-cell and large-cell neuroendocrine carcinomas: a multicenter retrospective cohort study
Source: Springer Nature journal article supplement (doi:10.1186/s12885-023-10952-w), 2023-05-15
Supplement: MOESM1 [file 12885_2023_10952_MOESM1_ESM.pdf]

**Figure S1. H&E stain of LCC and LCNEC.**

Representative pathology images of large-cell carcinoma (LCC) and large-cell neuroendocrine carcinoma (LCNEC). Hematoxylin-eosin staining of LCC at 20× (top left) and 40× (top right) magnification and of LCNEC at 20× (bottom left) and 40× (bottom right) magnification.

LCC

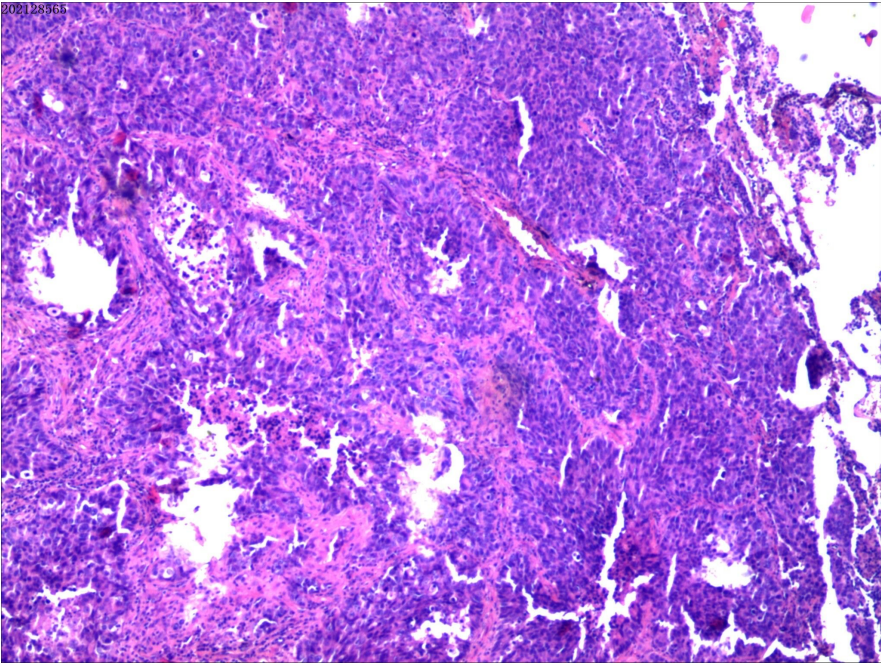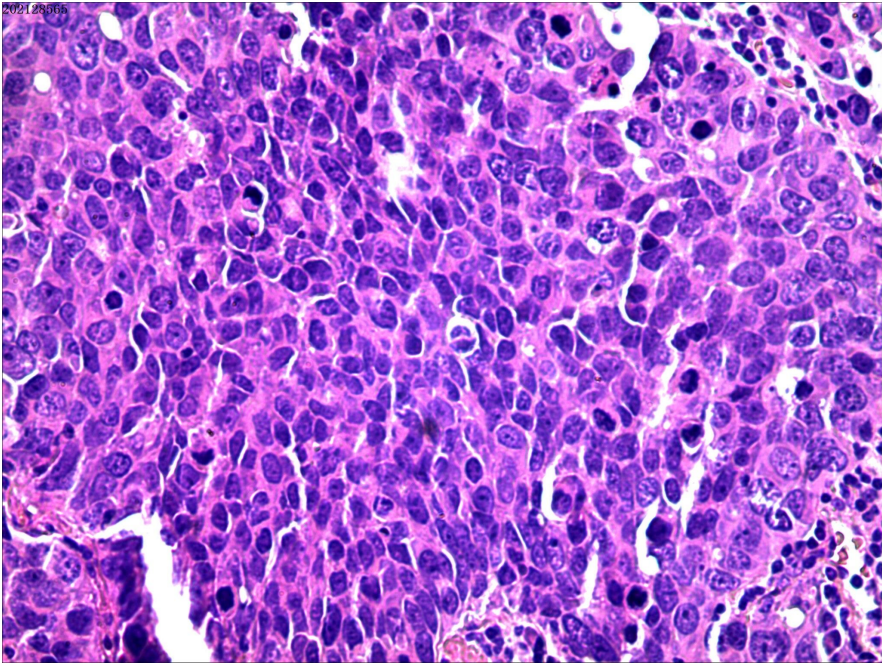

LCNEC

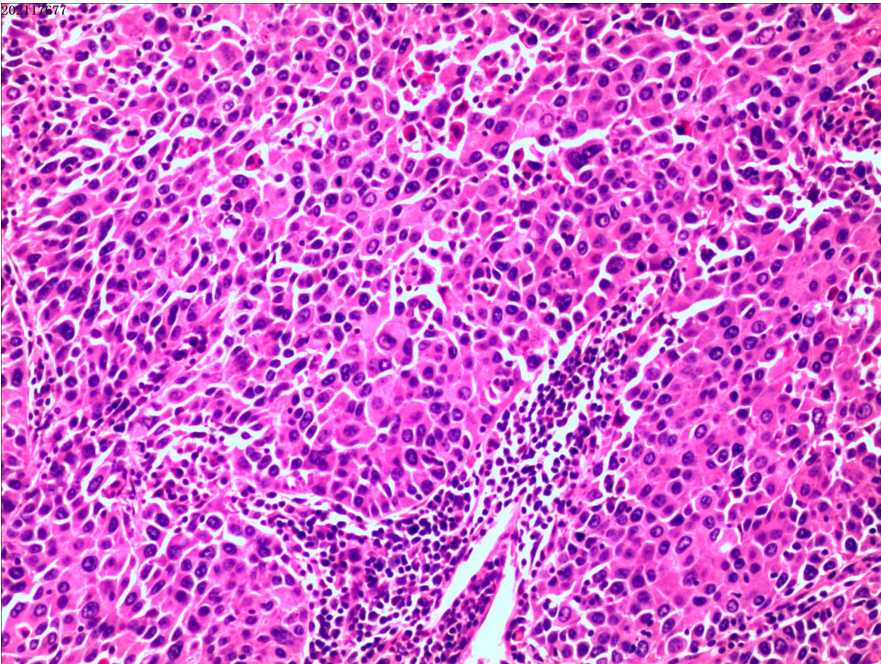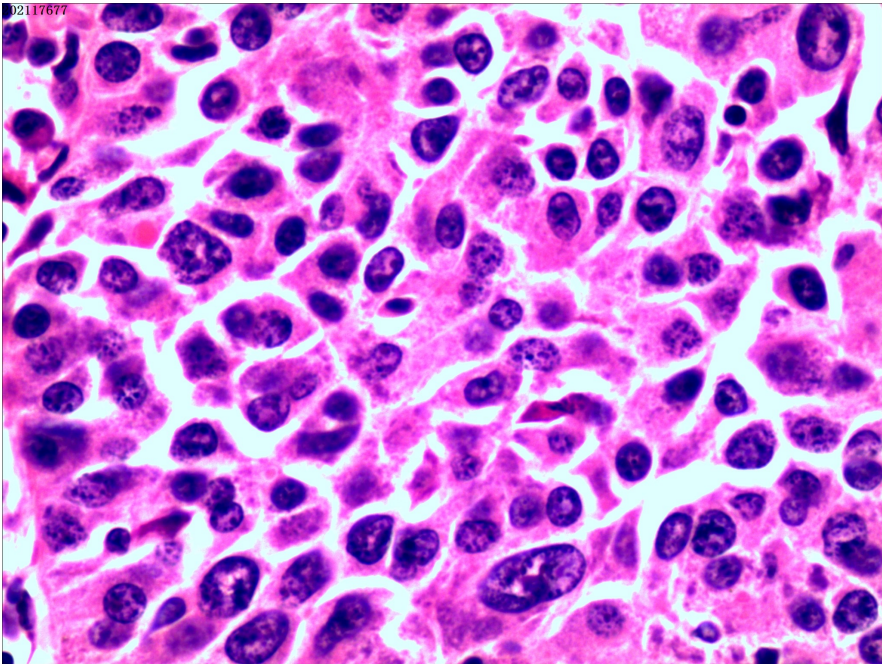



**Figure S2. IHC stain of LCC and LCNEC.**

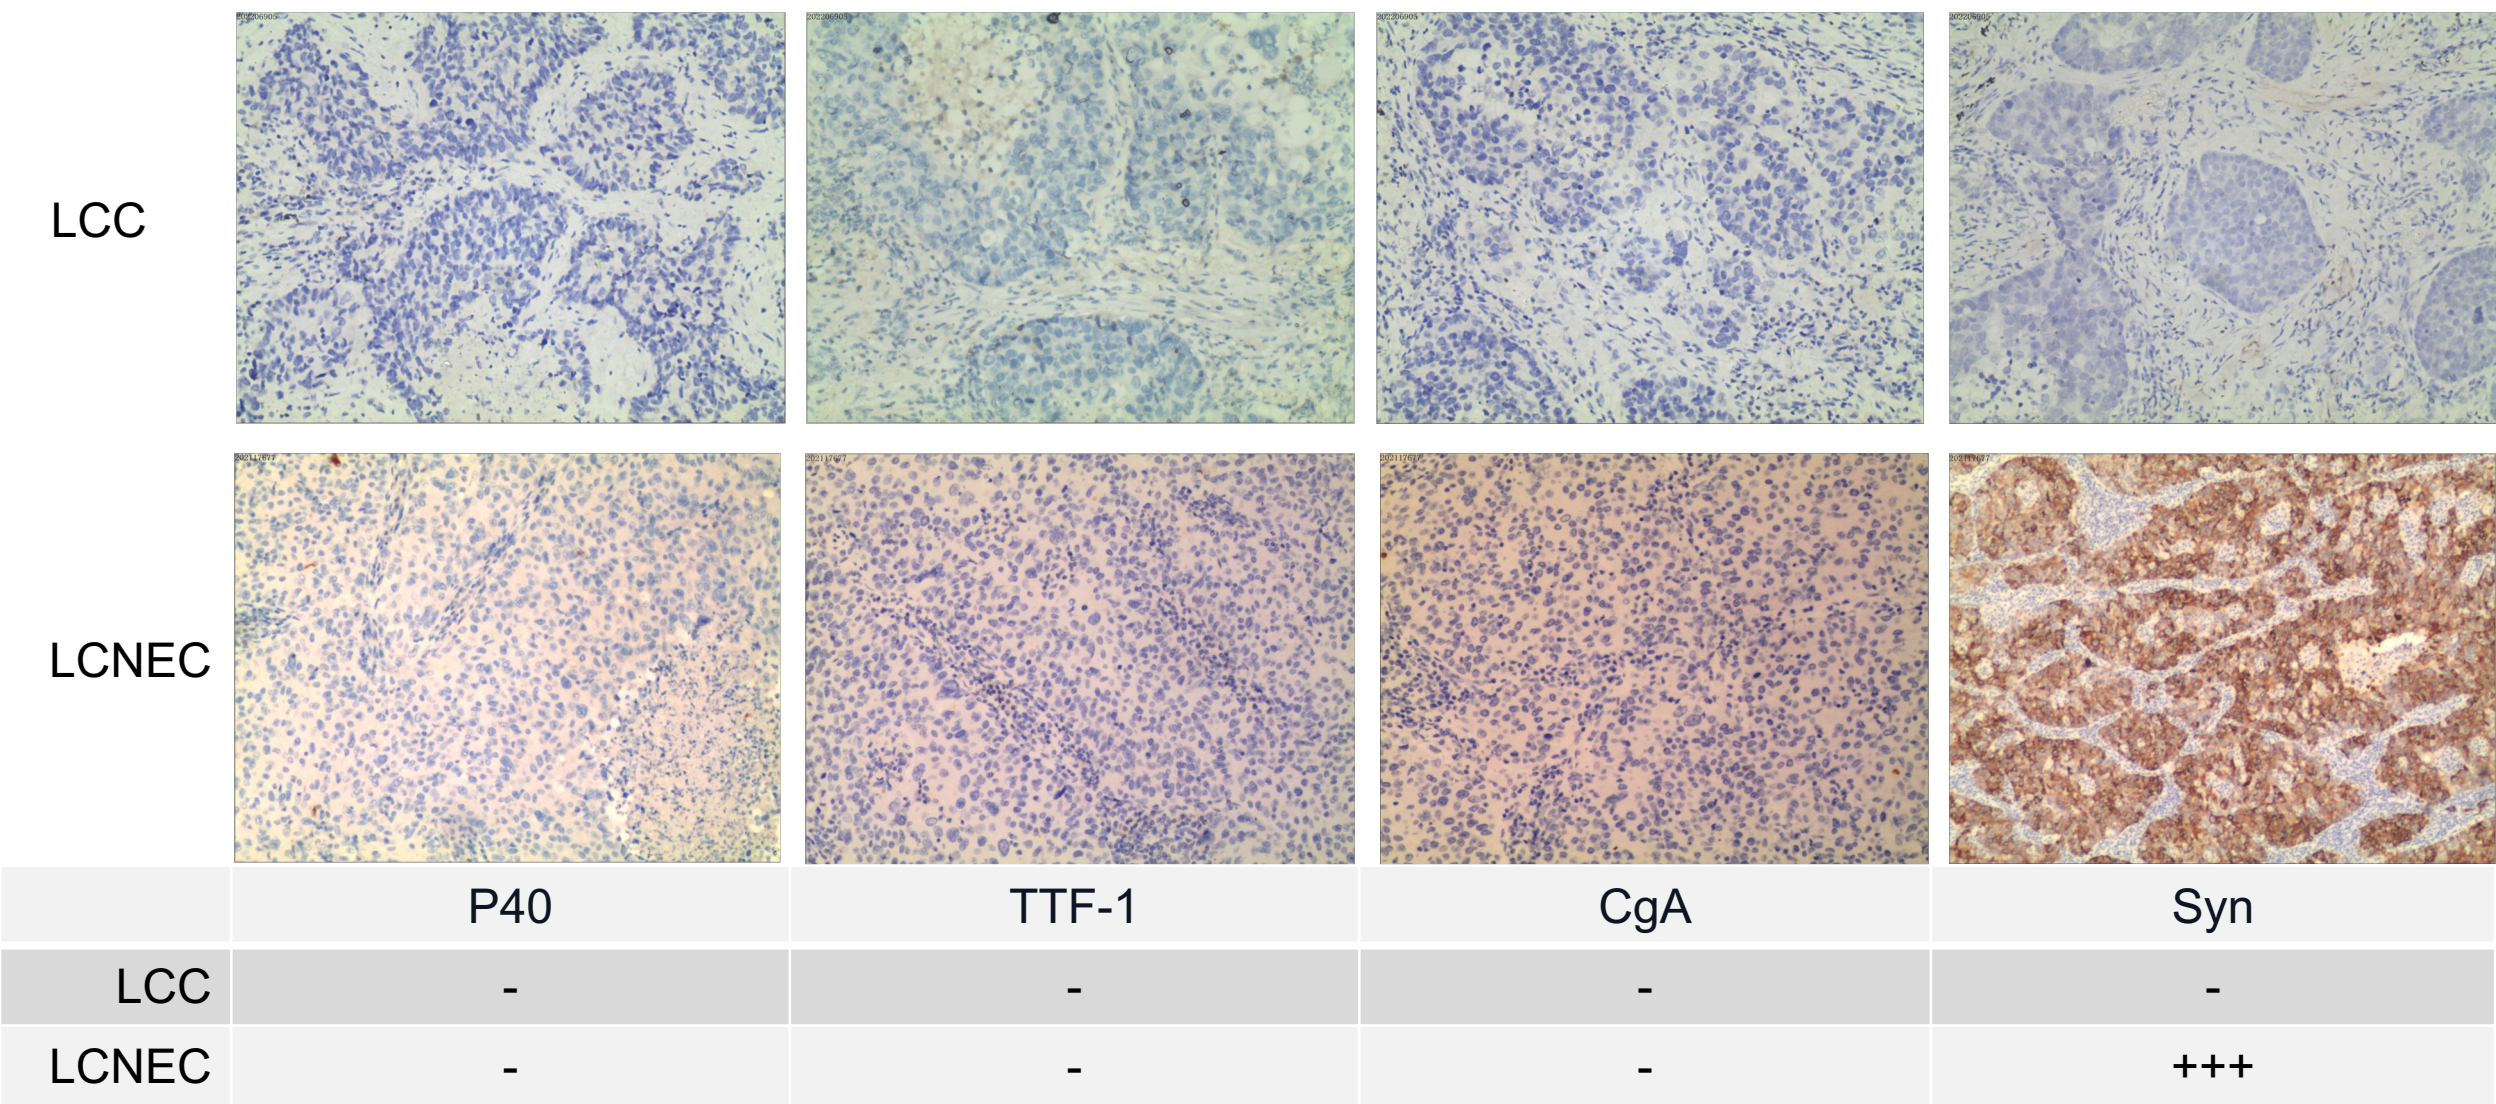

Representative immunohistochemical (IHC) staining images for differential diagnosis of large-cell carcinoma (LCC; upper panels) and large-cell neuroendocrine carcinoma (LCNEC; lower panels). IHC was performed using LCC and LCNEC biomarkers, including P40, TTF-1, CgA, and Syn.

**Figure S3. Study flow chart of patient selection.**

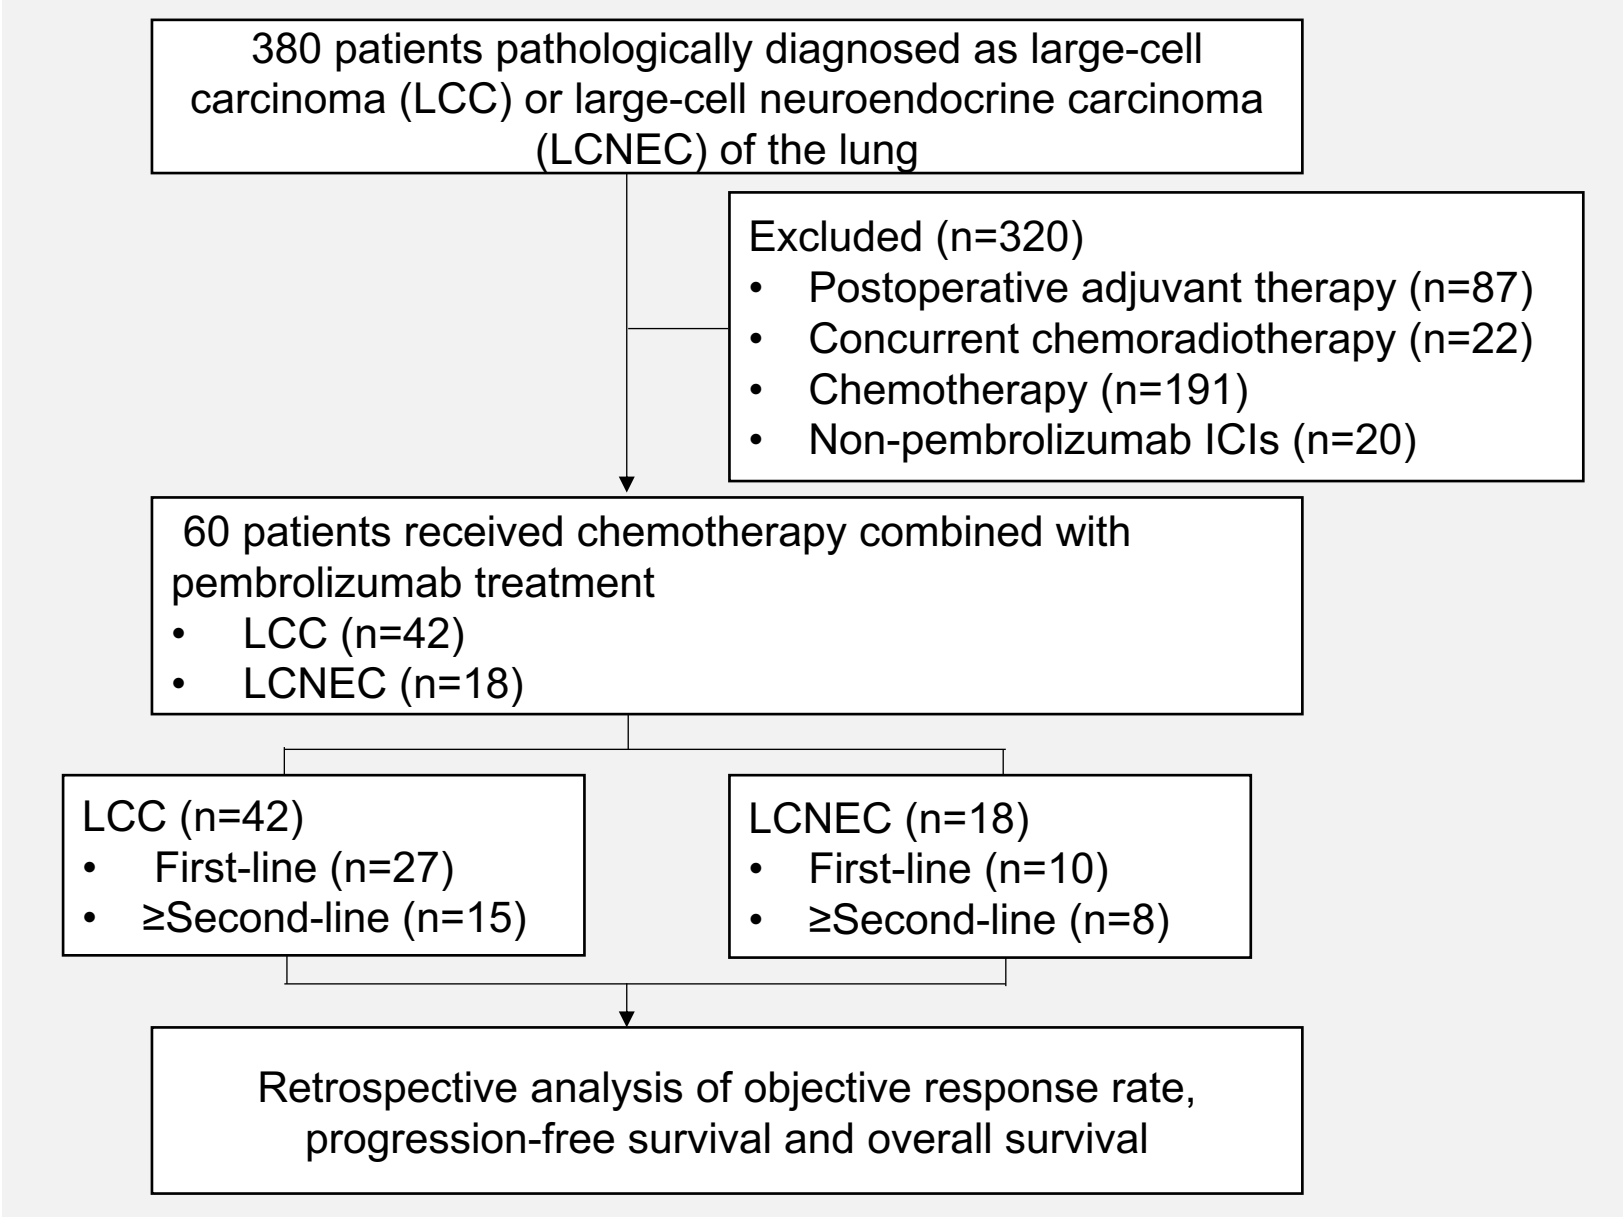

**Figure S4. Disease control rate with first-line pembrolizumab.**

Disease control rate for pembrolizumab combined with chemotherapy as first-line treatment (left bar) or pembrolizumab with or without chemotherapy as second or later-line treatment (right bar). PD, progressive disease; PR, partial response; SD, stable disease

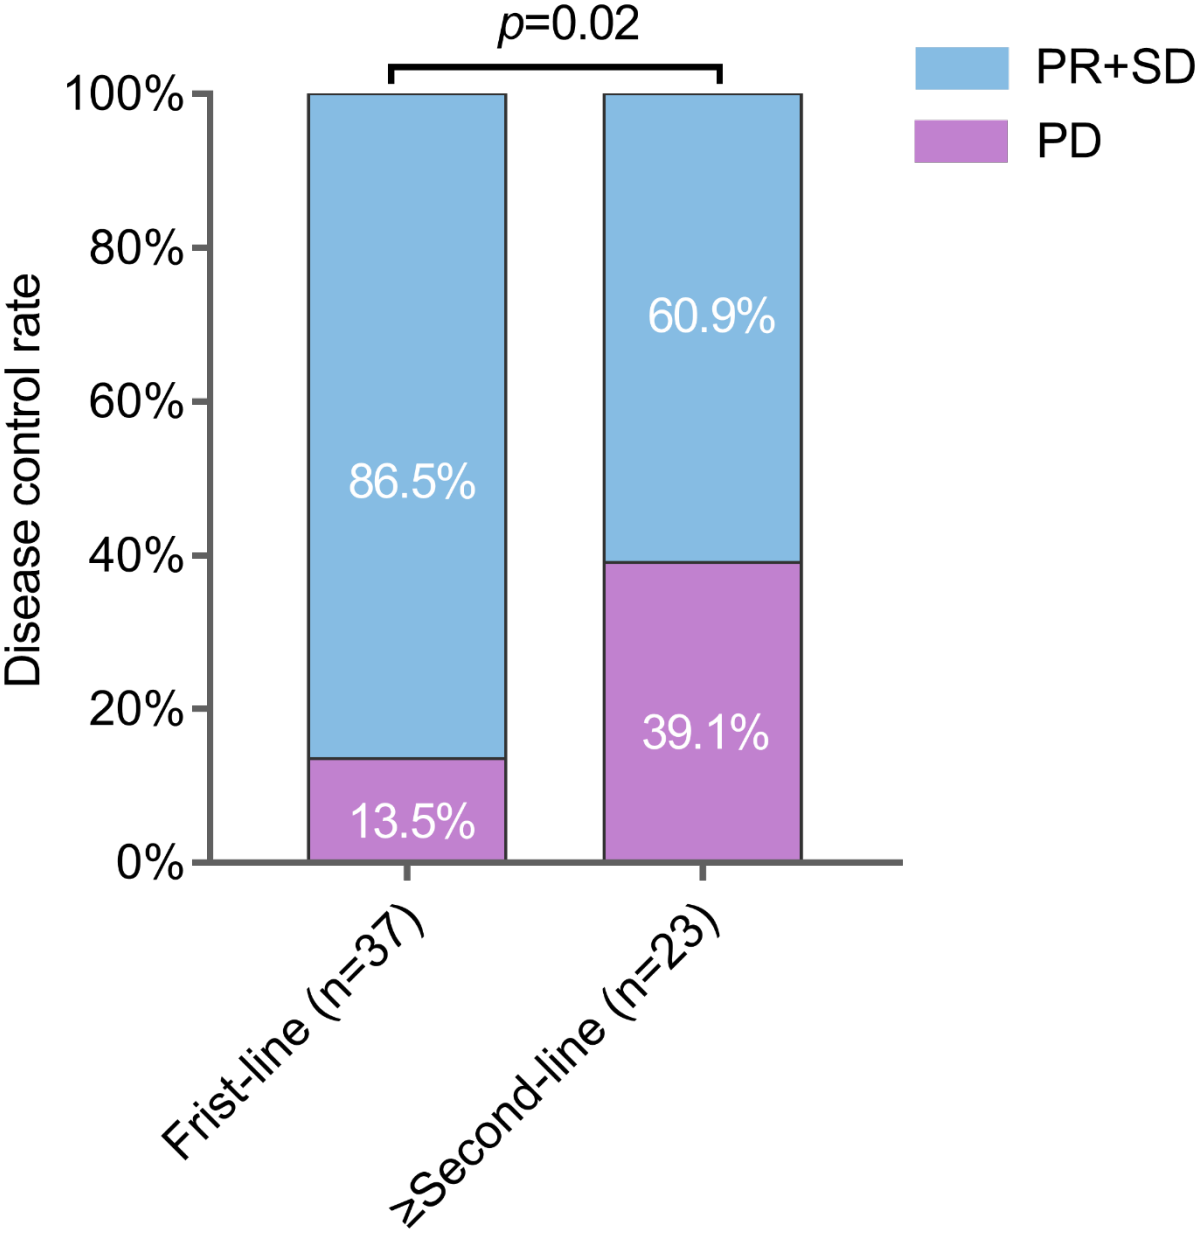



**Figure S5. PFS of first-line pembrolizumab in LCC and LCNEC.**

Kaplan-Meier curve comparing the progression-free survival (PFS) of patients who received pembrolizumab combined with chemotherapy as first-line treatment stratified according to histological subtypes (i.e., large-cell carcinoma [n=27] and large-cell neuroendocrine carcinoma [n=10]).

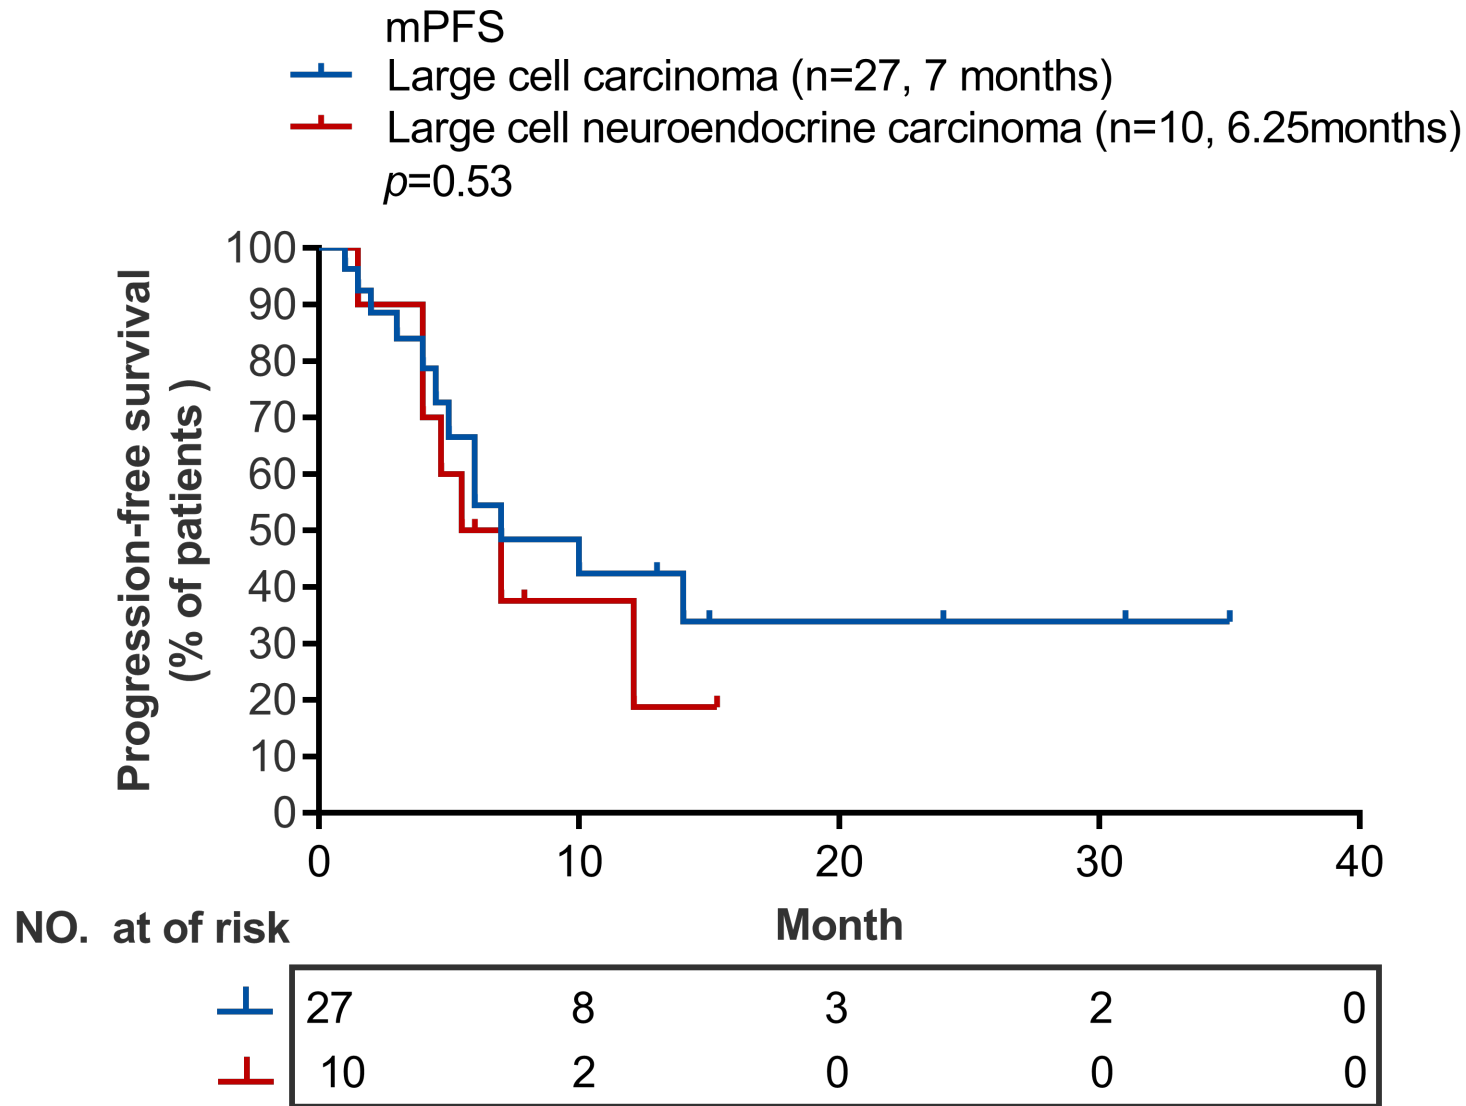



**Figure S6.**  
**Univariate and**  
**multivariate**  
**analysis for PFS**  
**in first-line**  
**pembrolizumab.**

The univariate (left)  
and multivariate  
(right) analysis to  
analyze the impact  
of various clinical  
variables on the  
progression-free  
survival (PFS) of  
patients who  
received  
pembrolizumab  
combined with  
chemotherapy as  
first-line treatment  
(n=37).

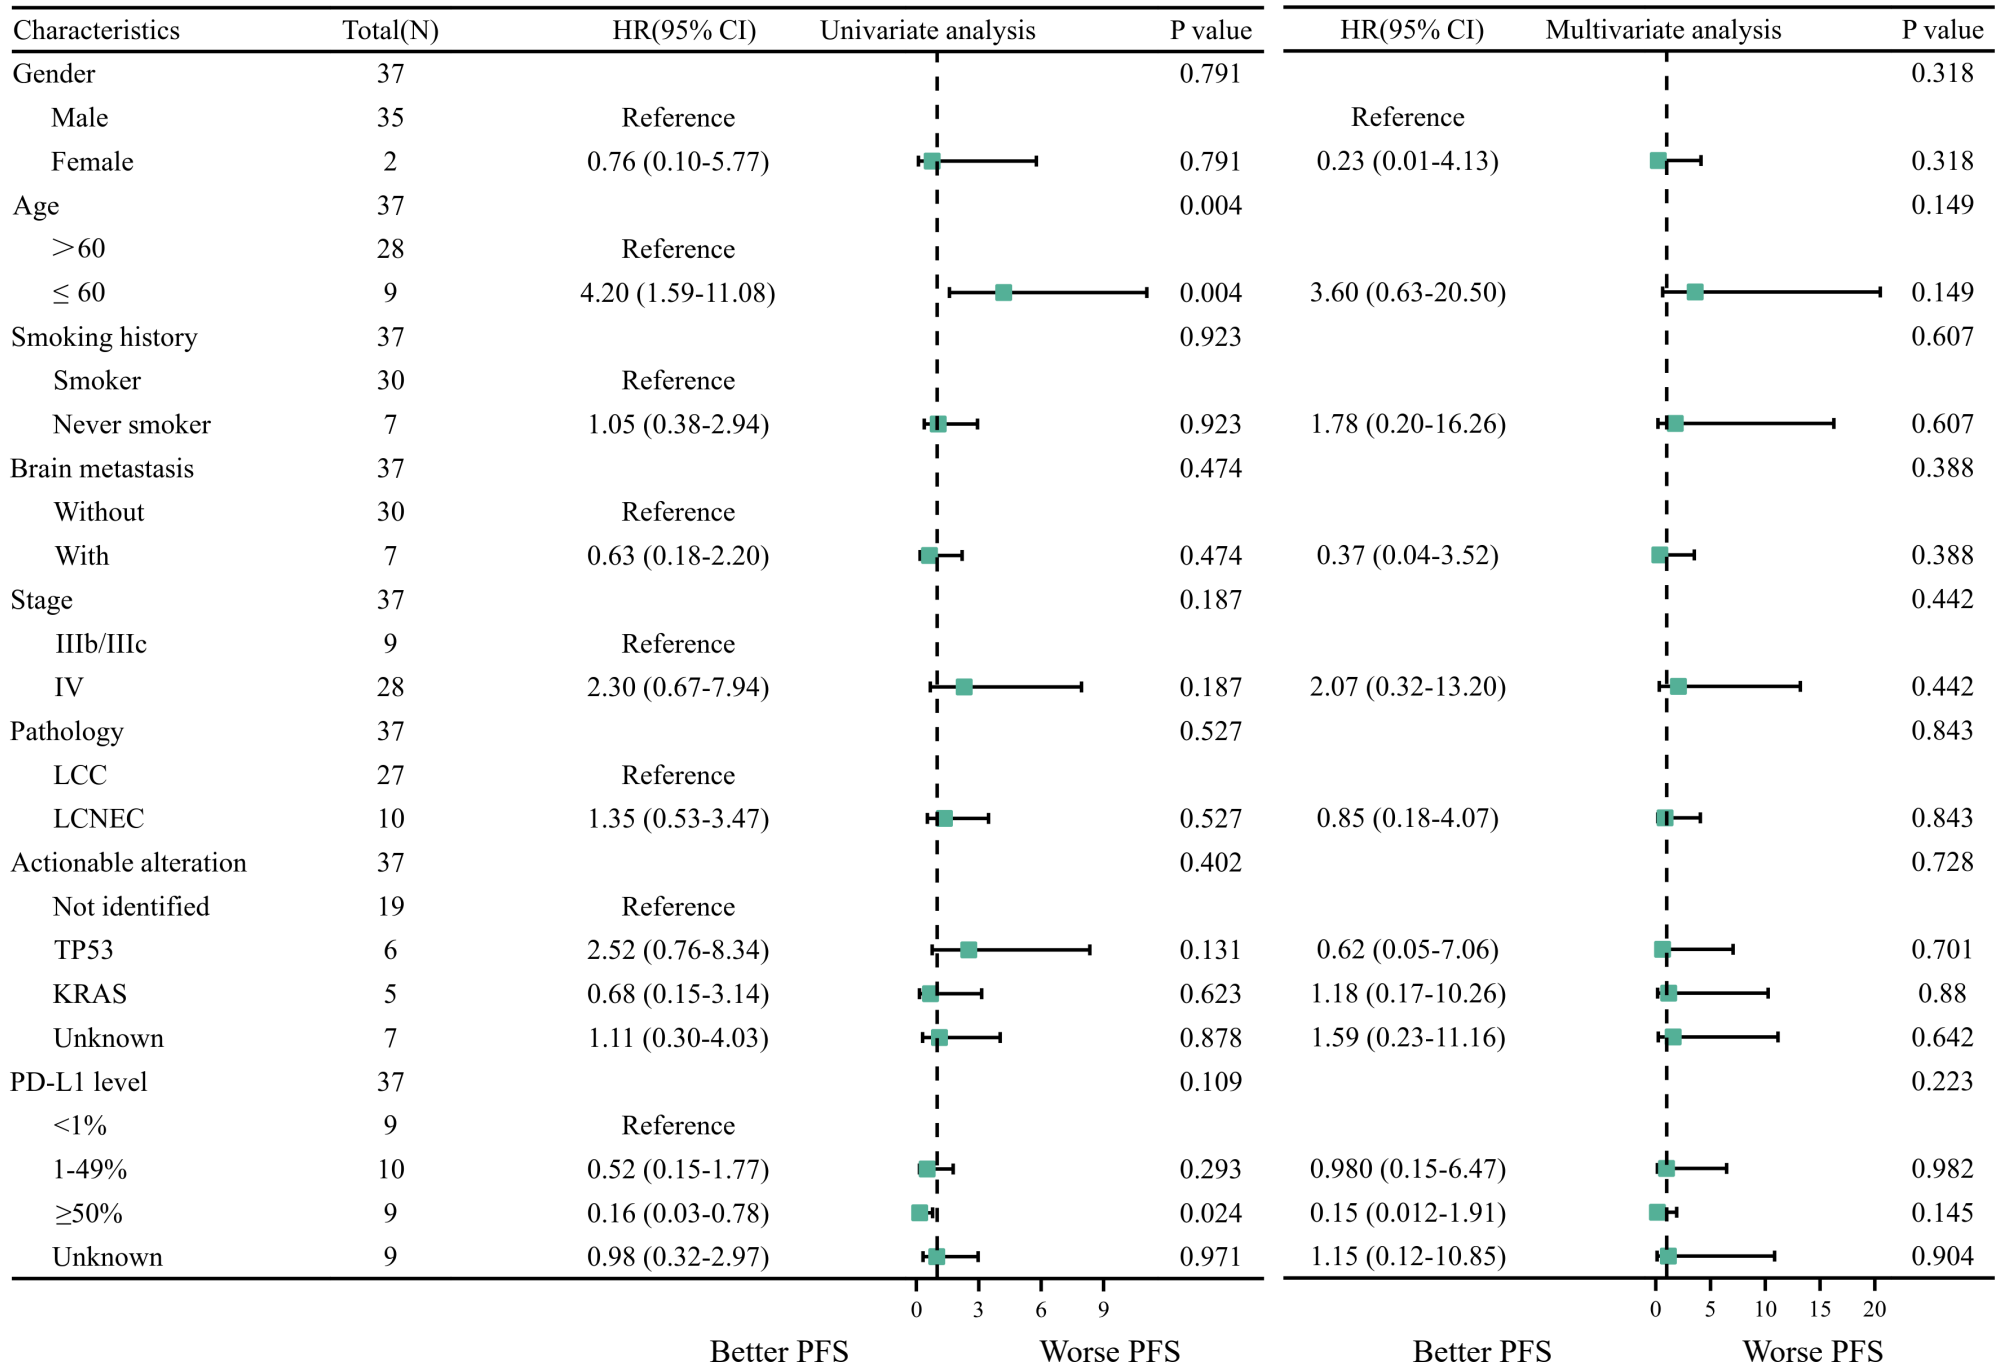



**Figure S7. Case vignette illustrating the treatment outcome of patient NO.60**

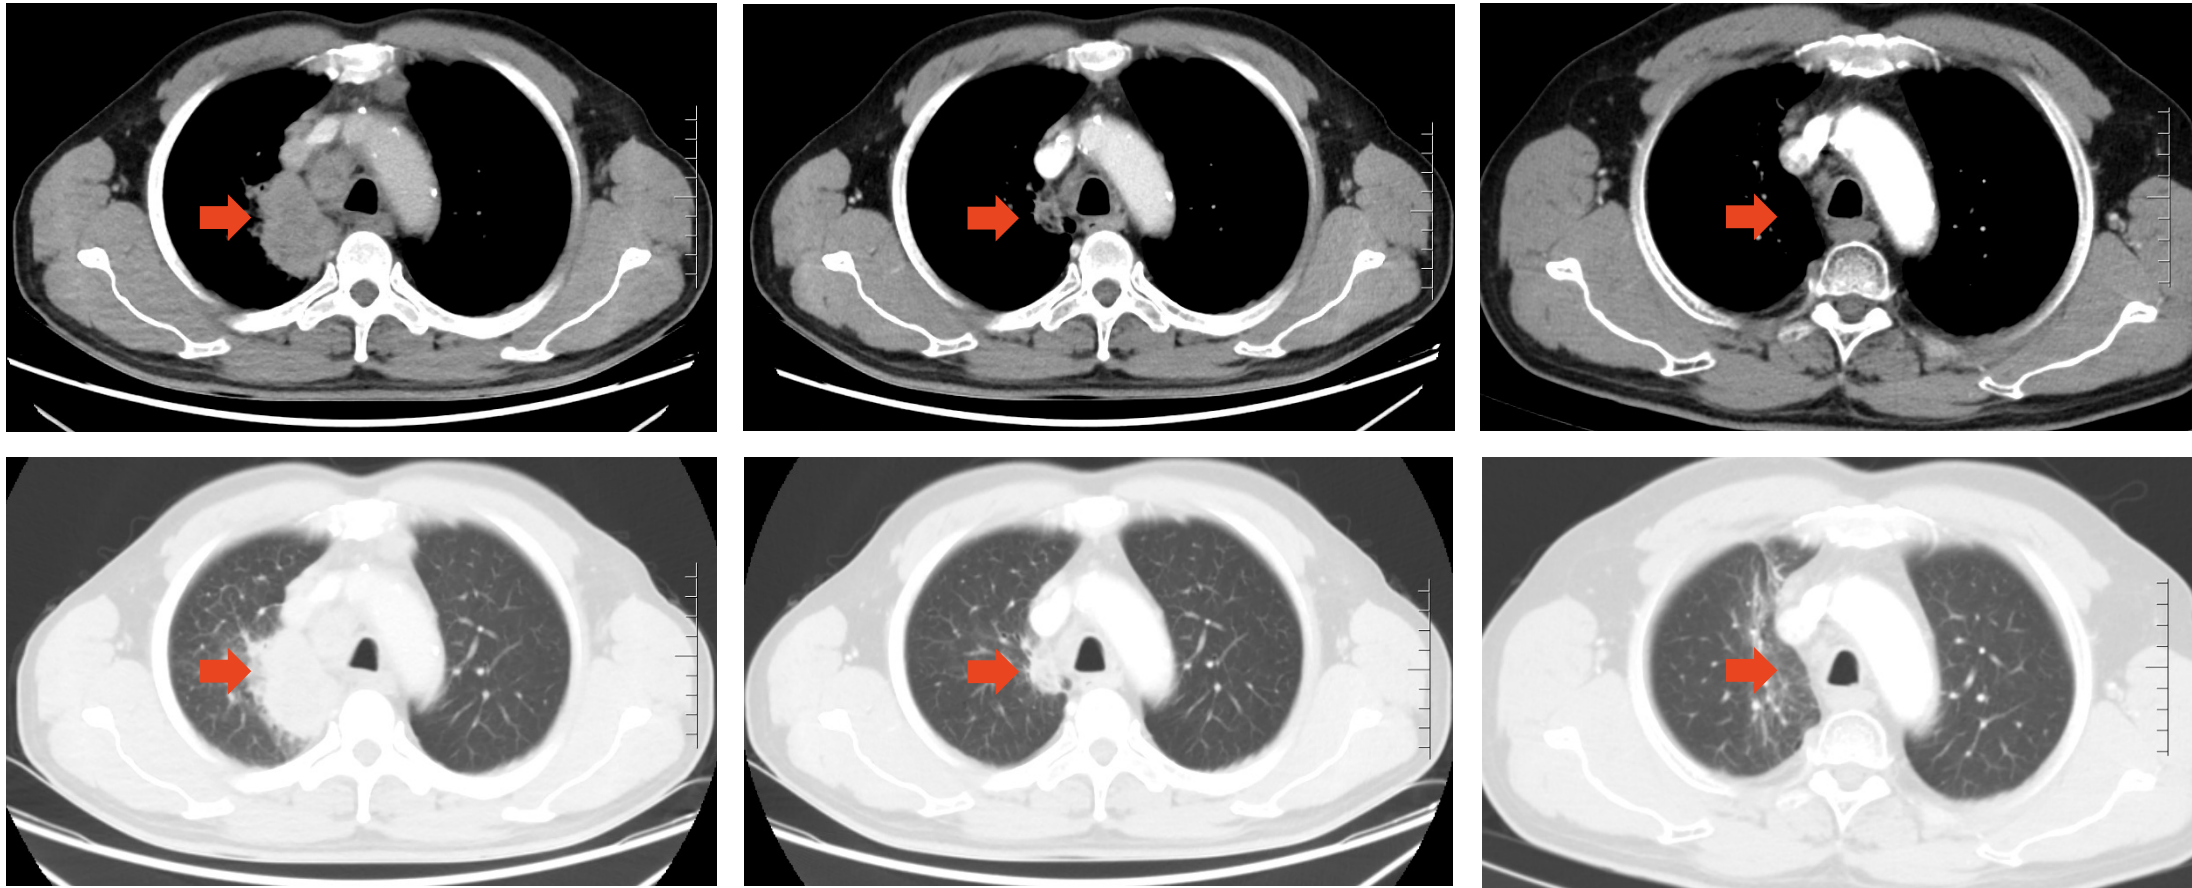

Before Treatment

After treatment 2 months

After treatment 12 months

Representative case showing the treatment response of a patient with stage IV large-cell carcinoma (Patient number 60) who received first-line pembrolizumab plus chemotherapy and achieved partial response. Computed tomography images at baseline (left panels), after receiving two cycles of the regimen middle panels), and after 12 months from initiating the regimen (right panels). Red arrows denote the primary lesion.



**Figure S8. Case vignette illustrating the treatment outcome of patient NO.59.**

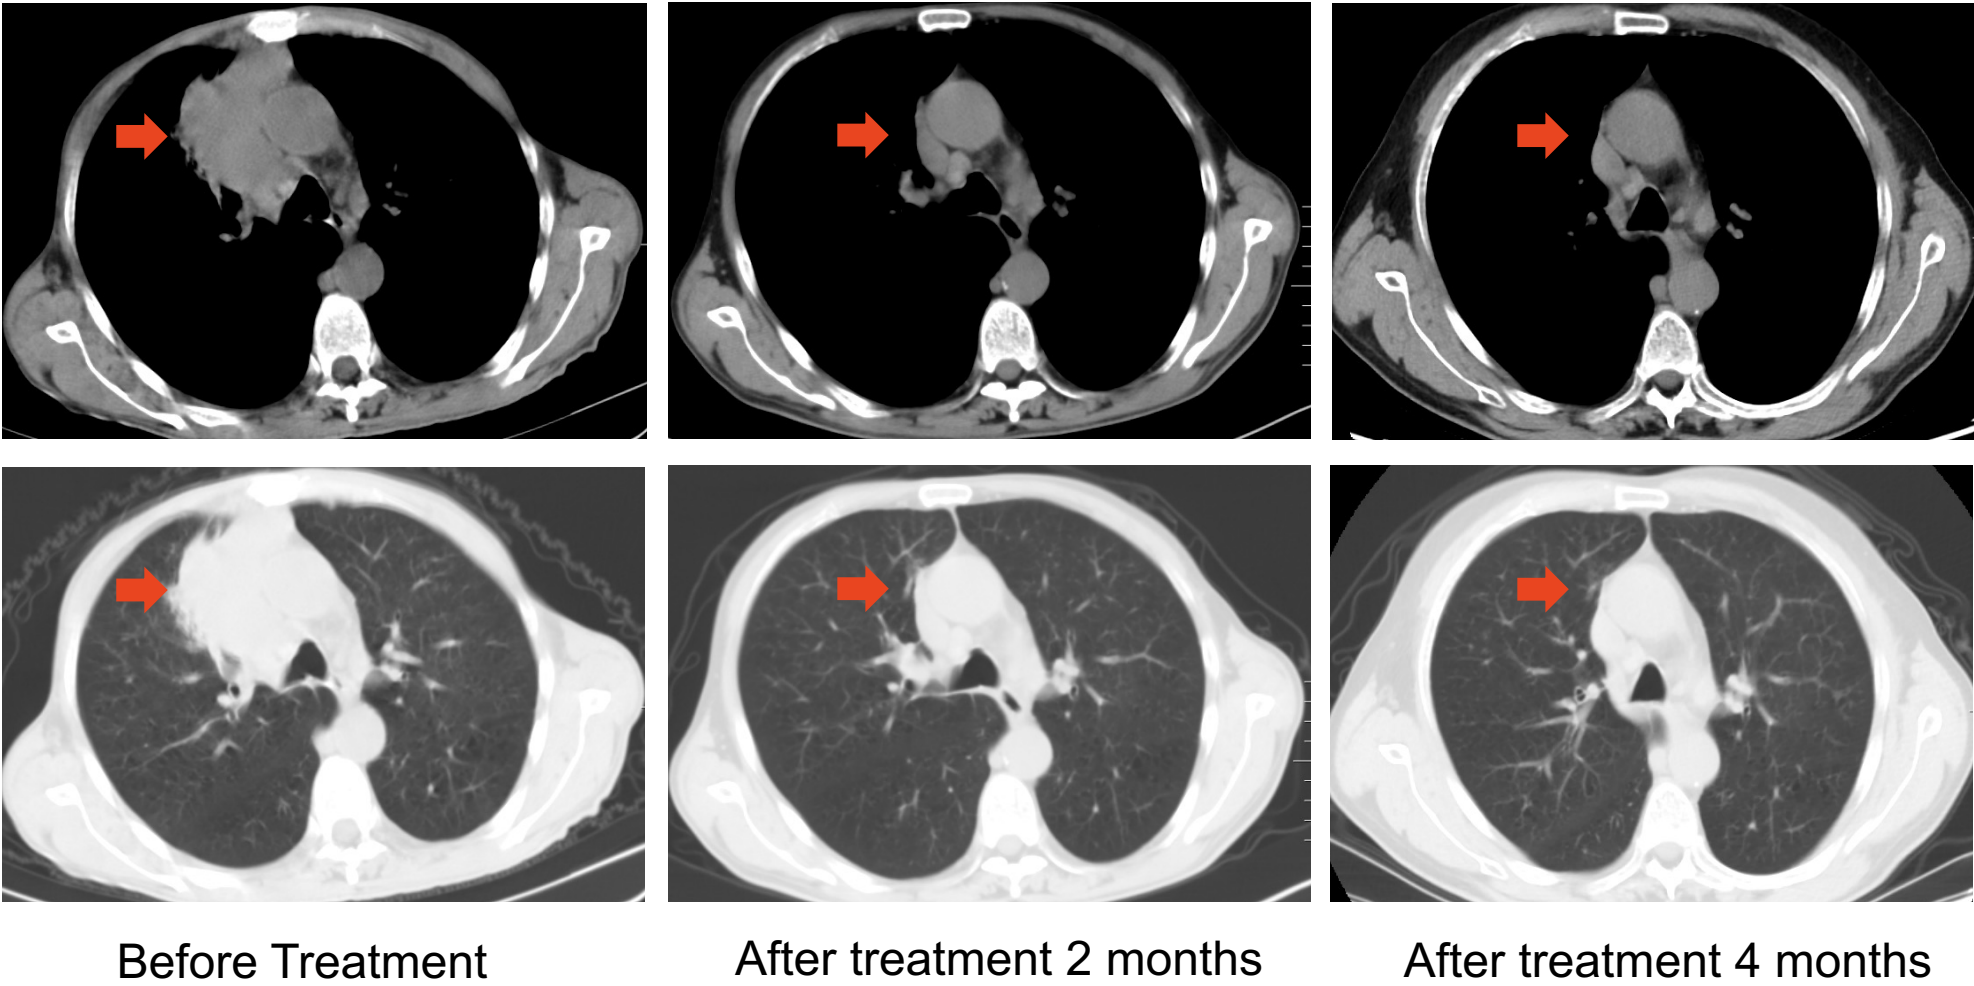

Representative case showing the treatment response of a patient with stage IV large-cell neuroendocrine carcinoma (Patient number 59) who received first-line pembrolizumab plus chemotherapy and achieved partial response. Computed tomography images at baseline (left panels), after receiving two cycles of the regimen (middle panels), and after 4 months from initiating the regimen (right panels). Red arrows denote the primary lesion.



**Table S1.** Detailed information of the 60 patients with large cell lung cancer or large cell neuroendocrine carcinoma who received pembrolizumab with or without chemotherapy.

| NO  | Gender | Age | Smoking status | Pathology Diagnosis | Stage | p63/p40 | TTF1/CD56 | Syn/Nap sin-A | Ki-67 | PD-L1 (22C3) | Treatment line | Treatment regimen   | Best Response | PFS (months) | OS (months) |
|-----|--------|-----|----------------|---------------------|-------|---------|-----------|---------------|-------|--------------|----------------|---------------------|---------------|--------------|-------------|
| P1  | F      | 39  | Never          | LCC                 | IV    | –       | –         | –             | 0.4   | Unknown      | 2              | Chemo+Pembrolizumab | PD            | 1.9          | 4.3         |
| P2  | M      | 58  | Former         | LCC                 | IV    | –       | –         | –             | 0.8   | Unknown      | 1              | Chemo+Pembrolizumab | PD            | 2            | 5           |
| P3  | M      | 65  | Former         | LCC                 | IV    | –       | –         | –             | 0.4   | 0            | 1              | Chemo+Pembrolizumab | PD            | 1            | 1           |
| P4  | M      | 31  | Former         | LCC                 | IV    | –       | –         | –             | 0.2   | 5            | 3              | Pembrolizumab       | PD            | 1            | 1           |
| P5  | M      | 63  | Former         | LCC                 | IV    | –       | –         | –             | 0.2   | 35           | 1              | Chemo+Pembrolizumab | PD            | 1.5          | 2           |
| P6  | M      | 76  | Former         | LCNEC               | IV    | –       | –         | ++            | 0.4   | Unknown      | 3              | Pembrolizumab       | PD            | 1.4          | 2.5         |
| P7  | M      | 65  | Never          | LCC                 | IV    | –       | –         | –             | 0.7   | 0            | 2              | Chemo+Pembrolizumab | PD            | 1            | 1           |
| P8  | M      | 58  | Former         | LCNEC               | IV    | –       | –         | +++           | 0.3   | 0            | 1              | Chemo+Pembrolizumab | PD            | 1.5          | 7+          |
| P9  | M      | 56  | Former         | LCNEC               | IV    | –       | –         | +++           | 0.6   | 10           | 2              | Chemo+Pembrolizumab | PD            | 2            | 5           |
| P10 | M      | 52  | Former         | LCC                 | IV    | –       | –         | –             | 0.8   | 50           | 2              | Chemo+Pembrolizumab | PD            | 1.5          | 1.5         |
| P11 | M      | 62  | Never          | LCC                 | IV    | –       | –         | –             | 0.8   | 0            | 2              | Chemo+Pembrolizumab | PD            | 1.3          | 9+          |
| P12 | M      | 55  | Former         | LCC                 | IV    | –       | –         | –             | 0.7   | 0            | 2              | Chemo+Pembrolizumab | PD            | 2            | 2           |
| P13 | M      | 55  | Former         | LCC                 | IV    | –       | –         | –             | 0.4   | Unknown      | 2              | Chemo+Pembrolizumab | PD            | 1.4          | 3.5         |
| P14 | F      | 49  | Never          | LCNEC               | IV    | –       | –         | ++            | 0.8   | Unknown      | 2              | Pembrolizumab       | SD            | 7.6          | 9.5+        |

|     |   |    |        |       |      |   |   |     |     |         |   |                         |    |      |      |
|-----|---|----|--------|-------|------|---|---|-----|-----|---------|---|-------------------------|----|------|------|
| P15 | M | 63 | Never  | LCNEC | IV   | – | – | +   | 0.7 | 0       | 2 | Chemo+Pembroli<br>zumab | SD | 3    | 8    |
| P16 | M | 66 | Never  | LCC   | IV   | – | – | –   | 0.6 | 90      | 1 | Chemo+Pembroli<br>zumab | SD | 6    | 11+  |
| P17 | M | 64 | Former | LCC   | IV   | – | – | –   | 0.6 | 10      | 1 | Chemo+Pembroli<br>zumab | SD | 10+  | 10+  |
| P18 | M | 54 | Former | LCC   | IV   | – | – | –   | 0.3 | 70      | 1 | Chemo+Pembroli<br>zumab | SD | 3    | 5    |
| P19 | M | 67 | Former | LCC   | IV   | – | – | –   | 0.6 | 2       | 1 | Chemo+Pembroli<br>zumab | SD | 2+   | 2+   |
| P20 | M | 54 | Former | LCC   | IV   | – | – | –   | 0.8 | 0       | 2 | Chemo+Pembroli<br>zumab | SD | 3    | 3    |
| P21 | M | 53 | Former | LCC   | IV   | – | – | –   | 0.8 | Unknown | 3 | Pembrolizumab           | SD | 6    | 9    |
| P22 | F | 65 | Never  | LCC   | IV   | – | – | –   | 0.2 | 1       | 1 | Chemo+Pembroli<br>zumab | SD | 14   | 24   |
| P23 | M | 54 | Never  | LCNEC | IV   | – | – | ++  | 0.6 | Unknown | 2 | Chemo+Pembroli<br>zumab | SD | 6+   | 6+   |
| P24 | M | 71 | Former | LCC   | IIIb | – | – | –   | 0.7 | 30      | 1 | Chemo+Pembroli<br>zumab | SD | 4.5  | 13   |
| P25 | M | 64 | Former | LCC   | IIIb | – | – | –   | 0.7 | Unknown | 1 | Chemo+Pembroli<br>zumab | SD | 1.5+ | 1.5+ |
| P26 | M | 55 | Former | LCNEC | IV   | – | – | ++  | 0.9 | 0       | 2 | Chemo+Pembroli<br>zumab | SD | 8+   | 8+   |
| P27 | M | 73 | Former | LCC   | IV   | – | – | –   | 0.6 | 0       | 2 | Chemo+Pembroli<br>zumab | SD | 4.5  | 4.5  |
| P28 | M | 70 | Former | LCNEC | IV   | – | – | +   | 0.5 | 0       | 3 | Chemo+Pembroli<br>zumab | SD | 3.8  | 3.8+ |
| P29 | M | 47 | Former | LCNEC | IV   | – | – | +++ | 0.3 | Unknown | 1 | Chemo+Pembroli<br>zumab | SD | 4    | 8    |
| P30 | M | 57 | Former | LCNEC | IV   | – | – | ++  | 0.9 | 6       | 3 | Chemo+Pembroli<br>zumab | SD | 22+  | 22+  |



|     |   |    |        |       |      |   |   |     |      |         |   |                         |    |     |      |
|-----|---|----|--------|-------|------|---|---|-----|------|---------|---|-------------------------|----|-----|------|
| P31 | M | 60 | Former | LCC   | IV   | – | – | –   | 0.6  | 0       | 1 | Chemo+Pembroli<br>zumab | SD | 4   | 5    |
| P32 | M | 66 | Former | LCC   | IV   | – | – | –   | 0.6  | 5       | 1 | Chemo+Pembroli<br>zumab | SD | 2+  | 2+   |
| P33 | M | 67 | Former | LCC   | IV   | – | – | –   | 0.4  | 90      | 3 | Chemo+Pembroli<br>zumab | SD | 2   | 12.2 |
| P34 | M | 60 | Former | LCNEC | IV   | – | – | ++  | 0.7  | Unknown | 1 | Chemo+Pembroli<br>zumab | SD | 4.7 | 11.1 |
| P35 | F | 64 | Never  | LCC   | IV   | – | – | –   | 0.6  | 60      | 1 | Chemo+Pembroli<br>zumab | SD | 2+  | 2+   |
| P36 | M | 65 | Never  | LCC   | IIIb | – | – | –   | 0.3  | Unknown | 1 | Chemo+Pembroli<br>zumab | SD | 6   | 11+  |
| P37 | M | 65 | Former | LCC   | IIIb | – | – | –   | 0.8  | 90      | 1 | Chemo+Pembroli<br>zumab | SD | 3+  | 3+   |
| P38 | M | 71 | Former | LCC   | IV   | – | – | –   | 0.8  | 40      | 1 | Chemo+Pembroli<br>zumab | PR | 2+  | 6+   |
| P39 | M | 67 | Former | LCC   | IV   | – | – | –   | 0.5  | 0       | 2 | Pembrolizumab           | PR | 3.5 | 21.5 |
| P40 | M | 63 | Never  | LCC   | IV   | – | – | –   | 0.1  | 0       | 1 | Chemo+Pembroli<br>zumab | PR | 5   | 9+   |
| P41 | M | 56 | Former | LCC   | IV   | – | – | –   | 0.7  | Unknown | 2 | Chemo+Pembroli<br>zumab | PR | 6.5 | 14.5 |
| P42 | M | 61 | Never  | LCNEC | IV   | – | – | +++ | 0.9  | 20      | 1 | Chemo+Pembroli<br>zumab | PR | 7   | 13   |
| P43 | M | 73 | Former | LCC   | IV   | – | – | –   | 0.6  | 50      | 2 | Pembrolizumab           | PR | 17  | 19+  |
| P44 | M | 59 | Former | LCC   | IV   | – | – | –   | 0.8  | 0       | 1 | Chemo+Pembroli<br>zumab | PR | 10  | 11+  |
| P45 | M | 46 | Former | LCC   | IV   | – | – | –   | 0.85 | 0       | 1 | Chemo+Pembroli<br>zumab | PR | 4+  | 4+   |
| P46 | M | 66 | Former | LCNEC | IV   | – | – | +++ | 0.7  | 0       | 1 | Chemo+Pembroli<br>zumab | PR | 4   | 13   |

|     |   |    |        |       |      |   |   |     |     |         |   |                     |    |       |       |
|-----|---|----|--------|-------|------|---|---|-----|-----|---------|---|---------------------|----|-------|-------|
| P47 | M | 79 | Former | LCC   | IV   | – | – | –   | 0.4 | 12      | 1 | Chemo+Pembrolizumab | PR | 3+    | 3+    |
| P48 | M | 74 | Former | LCNEC | IIIb | – | – | ++  | 0.5 | Unknown | 1 | Chemo+Pembrolizumab | PR | 6+    | 12+   |
| P49 | M | 73 | Former | LCNEC | IV   | – | – | ++  | 0.5 | Unknown | 1 | Chemo+Pembrolizumab | PR | 5.5   | 9.5+  |
| P50 | M | 64 | Former | LCC   | IV   | – | – | –   | 0.8 | Unknown | 1 | Chemo+Pembrolizumab | PR | 4+    | 4+    |
| P51 | M | 63 | Former | LCNEC | IIIc | – | – | +++ | 0.3 | Unknown | 1 | Chemo+Pembrolizumab | PR | 12.1  | 33.5  |
| P52 | M | 65 | Former | LCC   | IV   | – | – | –   | 0.3 | 60      | 1 | Chemo+Pembrolizumab | PR | 15+   | 15+   |
| P53 | M | 69 | Former | LCNEC | IIIb | – | – | +++ | 0.4 | 20      | 1 | Chemo+Pembrolizumab | PR | 7.9+  | 7.9+  |
| P54 | M | 54 | Former | LCC   | IV   | – | – | –   | 0.7 | 0       | 1 | Chemo+Pembrolizumab | PR | 7     | 13+   |
| P55 | M | 66 | Never  | LCC   | IV   | – | – | –   | 0.8 | 90      | 1 | Chemo+Pembrolizumab | PR | 24+   | 24+   |
| P56 | M | 55 | Former | LCC   | IV   | – | – | –   | 0.5 | 0       | 3 | Chemo+Pembrolizumab | PR | 14    | 22    |
| P57 | M | 64 | Former | LCC   | IIIb | – | – | –   | 0.6 | 90      | 1 | Chemo+Pembrolizumab | PR | 31+   | 31+   |
| P58 | M | 64 | Former | LCC   | IIIc | – | – | –   | 0.6 | 60      | 1 | Chemo+Pembrolizumab | PR | 13+   | 13+   |
| P59 | M | 63 | Former | LCNEC | IV   | – | – | ++  | 0.4 | 1       | 1 | Chemo+Pembrolizumab | PR | 15.3+ | 15.3+ |
| P60 | M | 64 | Former | LCC   | IV   | – | – | –   | 0.6 | 60      | 1 | Chemo+Pembrolizumab | PR | 35+   | 35+   |

Abbreviations: 1L, first-line; 2L, second-line; 3L, third-line; F, female; M, male; OS, overall survival; PD, progressive disease; PD-L1 TPS (22C3), programmed death- ligand 1 tumor proportion score (clone 22C3); PFS, progression-free survival; PR, partial response; SD, stable disease; WT, wild-type



**Table S2.** Detailed treatment history for 23 patients with large cell carcinoma (LCC) or large cell neuroendocrine carcinoma (LCNEC) who received ≥second-line pembrolizumab with or without chemotherapy.

| NO  | Pathology /<br>Diagnosis | ICI<br>treatment<br>line | ICI treatment<br>regimen received | Regimen received as 1L<br>treatment | PFS<br>(month<br>s) | Best<br>response | Progression<br>mode        | Regimen<br>received as<br>2L treatment | PFS<br>(month<br>s) | Best<br>response | Progression<br>mode |
|-----|--------------------------|--------------------------|-----------------------------------|-------------------------------------|---------------------|------------------|----------------------------|----------------------------------------|---------------------|------------------|---------------------|
| P1  | LCC                      | 2L                       | Chemo+Pembrolizumab               | TC                                  | 4                   | SD               | Lung                       | -                                      | -                   | -                | -                   |
| P4  | LCC                      | 3L                       | Pembrolizumab                     | PC+BEV+radiotherapy                 | 20                  | PR               | Brain                      | DC+BEV                                 | 13                  | SD               | Brain               |
| P6  | LCNEC                    | 3L                       | Pembrolizumab                     | TC                                  | 4                   | SD               | Adrenal gland              | -                                      | -                   | -                | -                   |
| P7  | LCC                      | 2L                       | Chemo+Pembrolizumab               | TC                                  | 1.7                 | PD               | Lung                       | -                                      | -                   | -                | -                   |
| P9  | LCNEC                    | 2L                       | Chemo+Pembrolizumab               | TC+BEV                              | 7                   | PR               | Lung                       | -                                      | -                   | -                | -                   |
| P10 | LCC                      | 2L                       | Chemo+Pembrolizumab               | TC                                  | 1.2                 | PD               | Bone, Brain, Adrenal gland | -                                      | -                   | -                | -                   |
| P11 | LCC                      | 2L                       | Chemo+Pembrolizumab               | TC+BEV+radiotherapy                 | 12                  | PR               | Lung                       | -                                      | -                   | -                | -                   |
| P12 | LCC                      | 2L                       | Chemo+Pembrolizumab               | PC                                  | 1                   | PD               | Lung                       | -                                      | -                   | -                | -                   |
| P13 | LCC                      | 2L                       | Chemo+Pembrolizumab               | TC                                  | 5                   | SD               | Liver                      | -                                      | -                   | -                | -                   |
| P14 | LCNEC                    | 2L                       | Pembrolizumab                     | TC                                  | 5.5                 | SD               | Lung                       | -                                      | -                   | -                | -                   |
| P15 | LCNEC                    | 2L                       | Chemo+Pembrolizumab               | EC                                  | 4                   | SD               | Brain                      | -                                      | -                   | -                | -                   |
| P20 | LCC                      | 2L                       | Chemo+Pembrolizumab               | TC+radiotherapy                     | 7                   | SD               | Lung                       | -                                      | -                   | -                | -                   |
| P21 | LCC                      | 3L                       | Pembrolizumab                     | GC                                  | 2                   | PD               | Lung, Bone                 | NC                                     | 4                   | SD               | Lung                |
| P23 | LCNEC                    | 2L                       | Chemo+Pembrolizumab               | TC+BEV                              | 5                   | SD               | Brain, lymph nodes         | -                                      | -                   | -                | -                   |
| P26 | LCNEC                    | 2L                       | Chemo+Pembrolizumab               | EC                                  | 7.5                 | SD               | Lung                       | -                                      | -                   | -                | -                   |

|     |       |    |                         |        |     |    |                      |    |   |    |       |
|-----|-------|----|-------------------------|--------|-----|----|----------------------|----|---|----|-------|
| P27 | LCC   | 2L | Chemo+Pembro<br>lizumab | TC     | 1   | PD | Lung, lymph<br>nodes | -  | - | -  | -     |
| P28 | LCNEC | 3L | Chemo+Pembro<br>lizumab | TC+BEV | 2.5 | SD | Lung, Brain          | DC | 2 | PD | Brain |
| P30 | LCNEC | 3L | Chemo+Pembro<br>lizumab | EC     | 2   | PD | Lung, Bone           | TC | 2 | PD | Lung  |
| P33 | LCC   | 3L | Chemo+Pembro<br>lizumab | TC     | 4   | PR | Lung, Bone           | DC | 4 | SD | Lung  |
| P39 | LCC   | 2L | Pembrolizumab           | TC     | 3   | SD | Liver                | -  | - | -  | -     |
| P41 | LCC   | 2L | Chemo+Pembro<br>lizumab | NC     | 3   | SD | Lung                 | -  | - | -  | -     |
| P43 | LCC   | 2L | Pembrolizumab           | PC     | 2   | PD | Lung                 | -  | - | -  | -     |
| P56 | LCC   | 3L | Chemo+Pembro<br>lizumab | EC     | 6   | SD | Brain                | IC | 5 | SD | Lung  |

Abbreviations: 1L, first-line; 2L, second-line; 3L, third-line; BEV, bevacizumab; DC, docetaxel cisplatin; EC, Etoposide carboplatin; GC, gemcitabine cisplatin; IC, irinotecan carboplatin; NC, vinorelbine carboplatin; PC, Pemetrexed carboplatin; PD, progressive disease; PFS, progression-free survival; PR, partial response; SD, stable disease; TC, paclitaxel cisplatin.
